# Supplementary material for: A Comparative Assessment of Replication Stress Markers in the Context of Telomerase
Source: MDPI journal article supplement (doi:10.3390/cancers14092205), 2022-04-28

Supplementary Figure S1 A

A

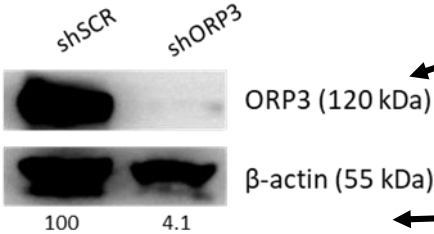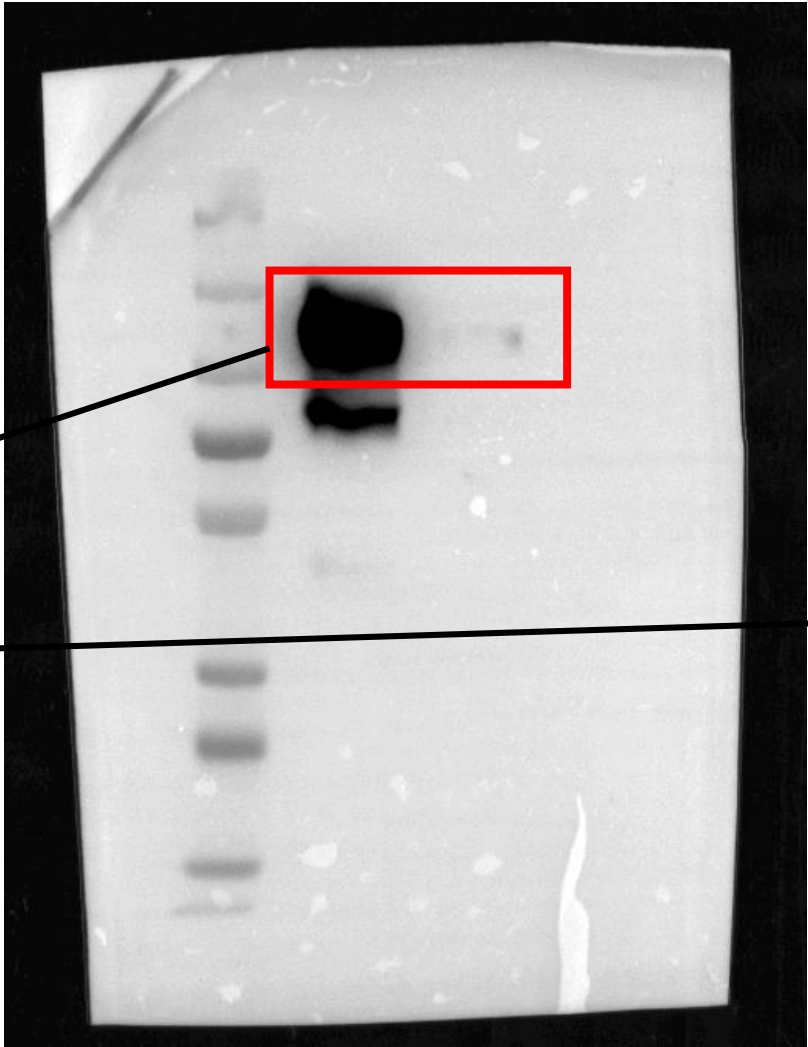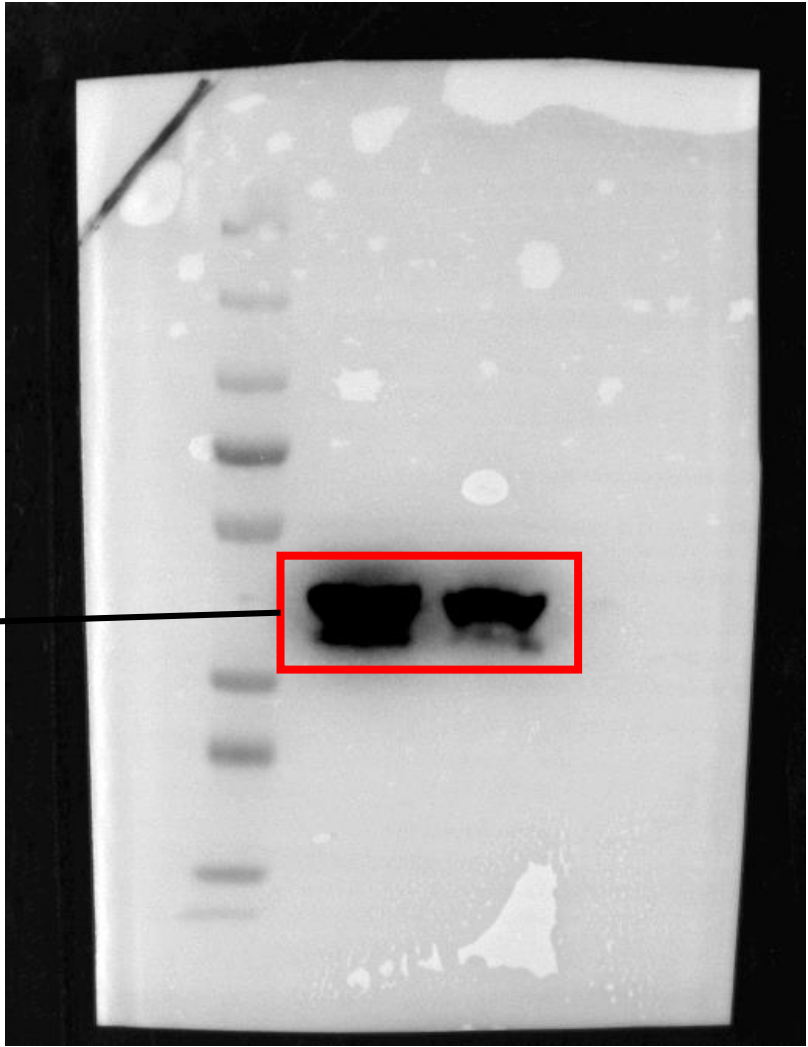

Supplementary Figure S1 B

B

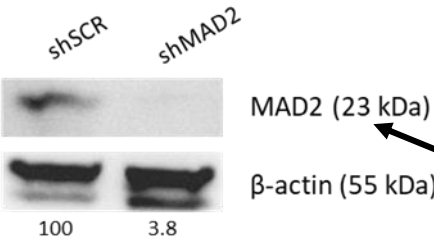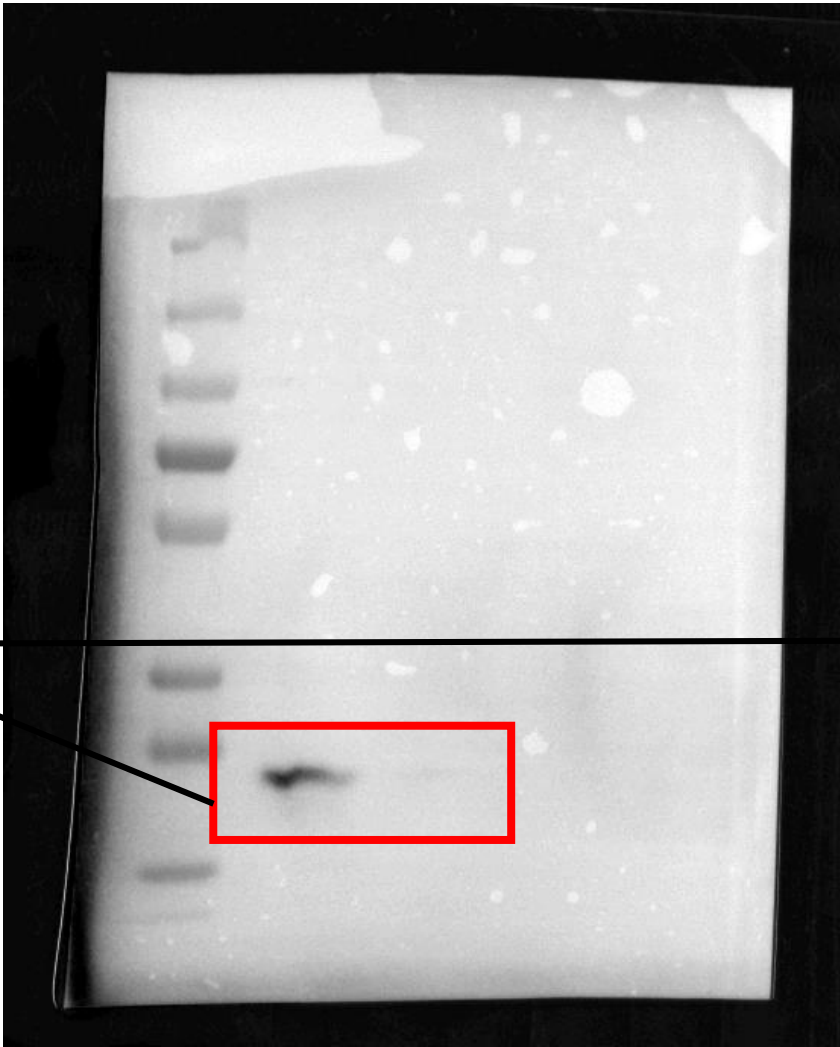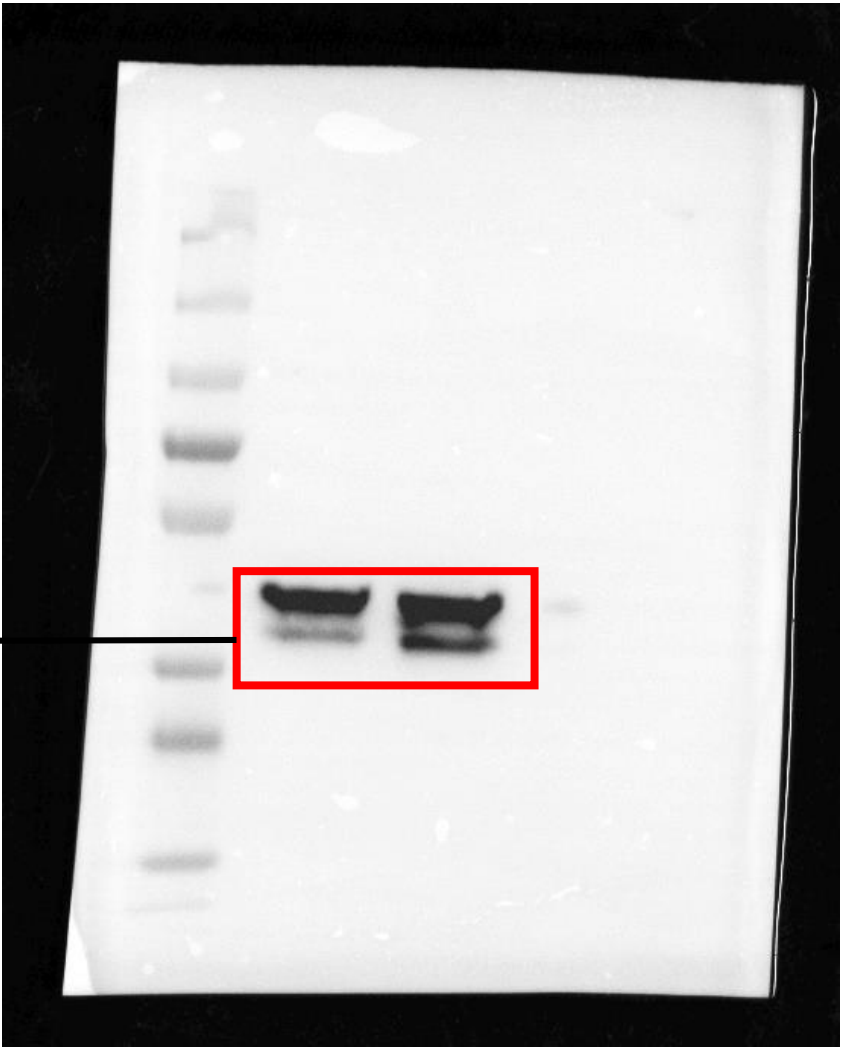

Supplementary Figure S1 C

c

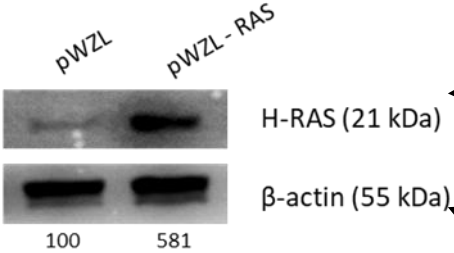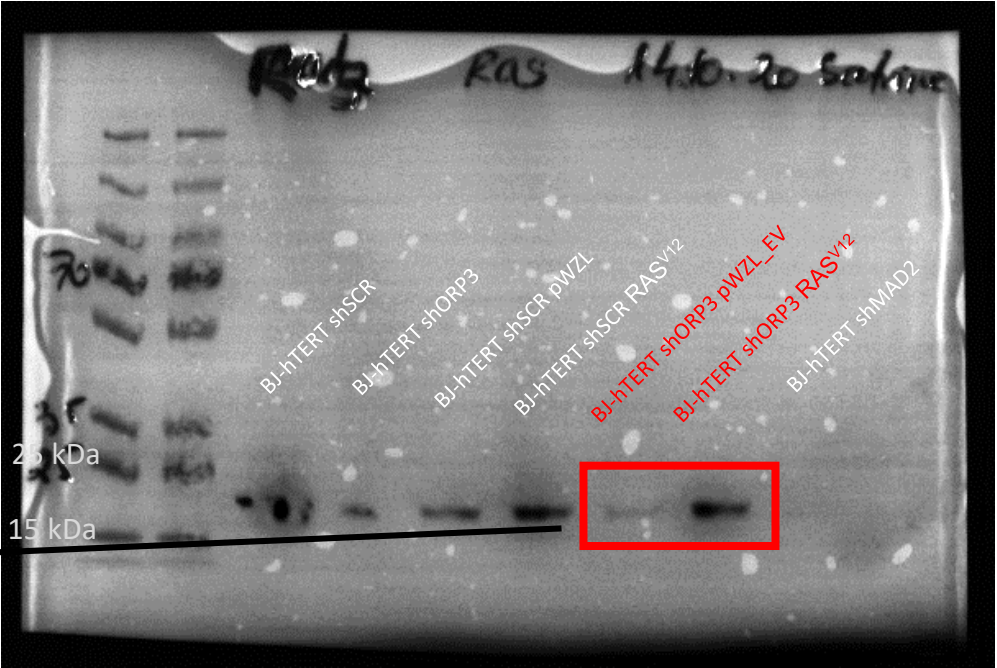

H-RAS

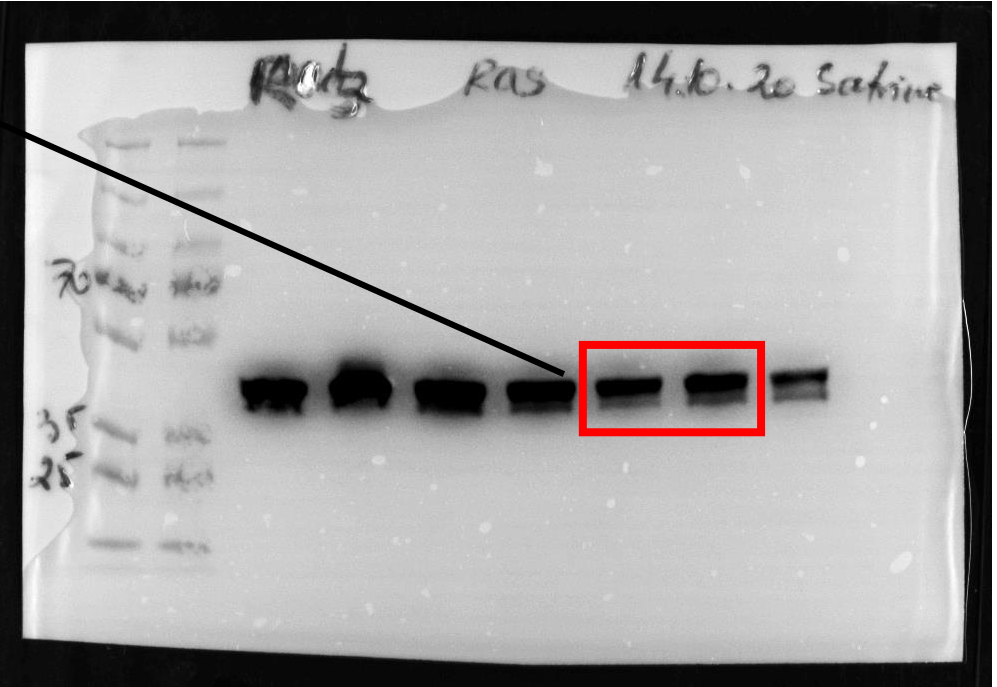

β-ACTIN

Supplementary Figure S1 D

2 repeat TRAP assays

BJ\_IgG BJ\_FLAG BJ-hT\_IgG BJ-hT\_FLAG NC Empty lane Empty lane BJ\_IgG BJ\_FLAG BJ-hT\_IgG BJ-hT\_FLAG NC

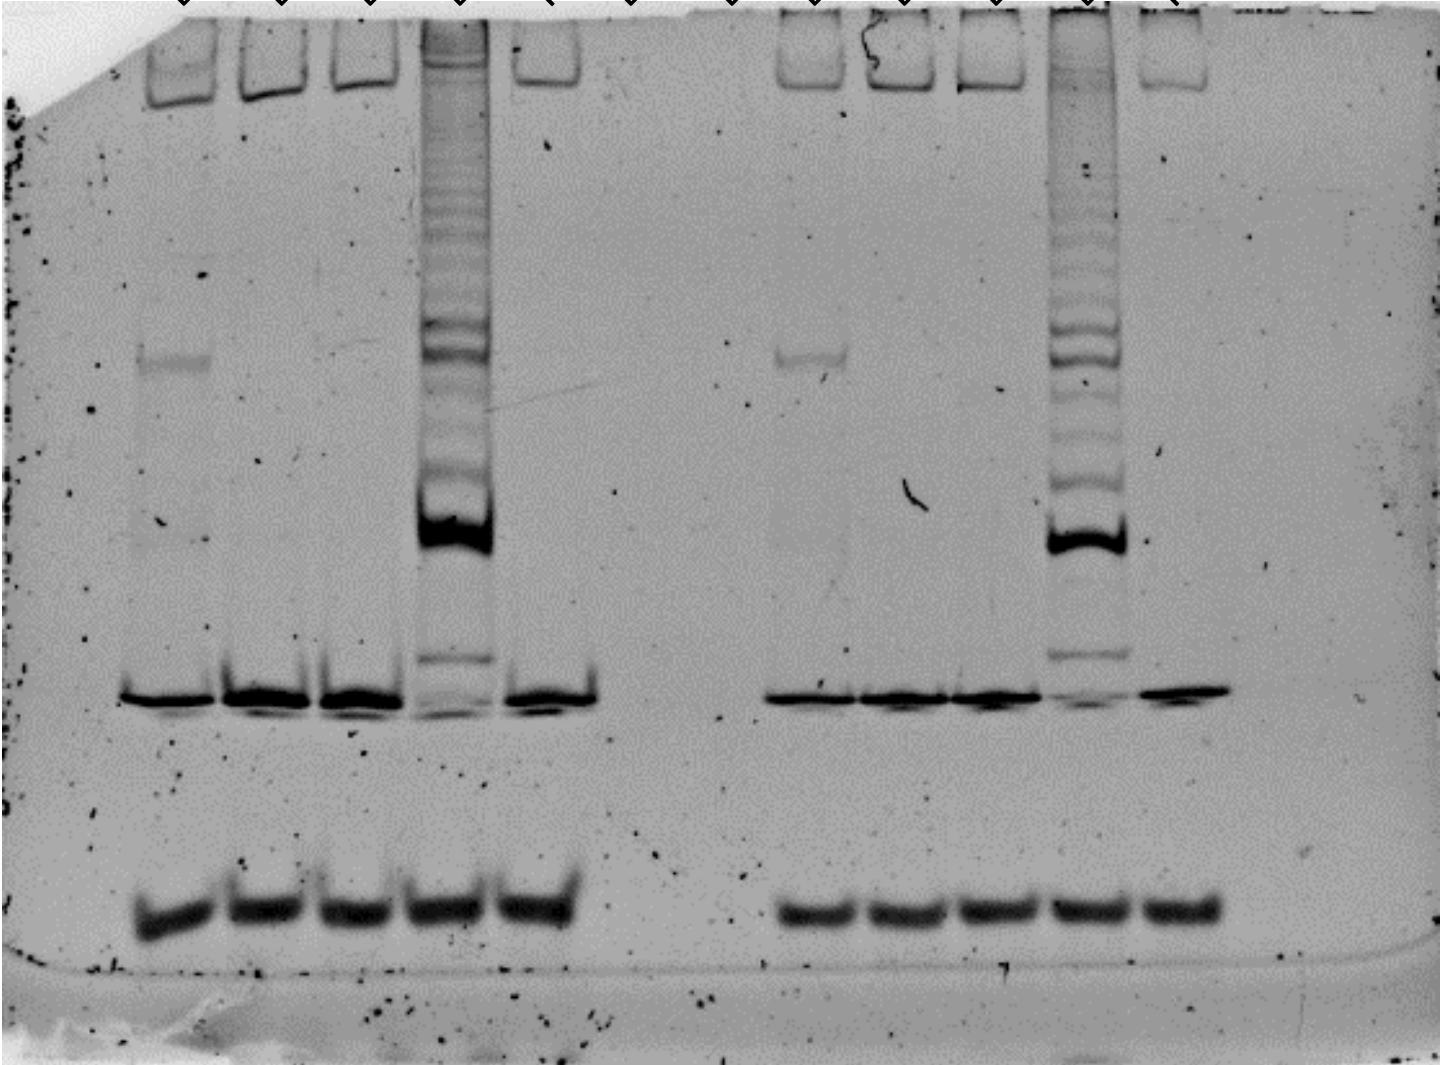

D

BJ\_IgG BJ\_FLAG BJ-hTERT\_IgG BJ-hTERT\_FLAG CHAPS ctrl

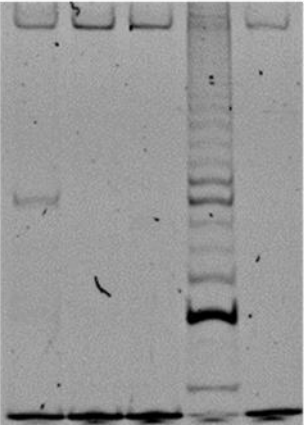



Supplementary Figure S2

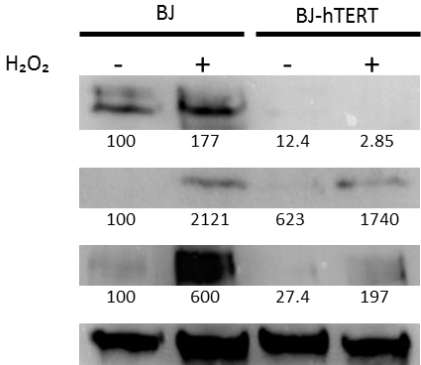

pRPA2 (37 kDa)

γ-H2AX (15 kDa)

53BP1 (250 kDa)

α-tubulin (55 kDa)

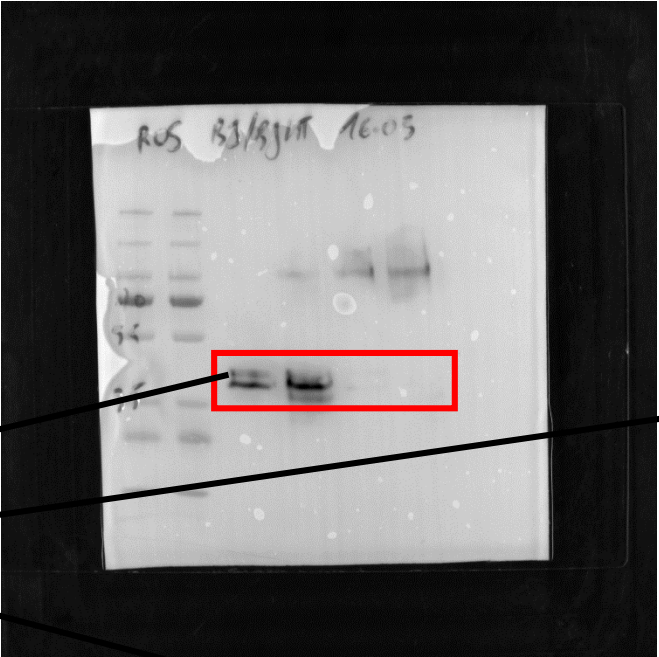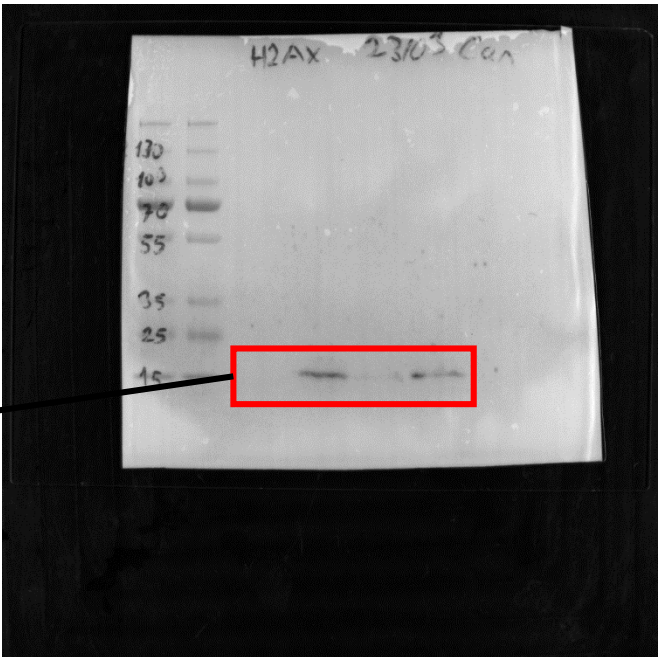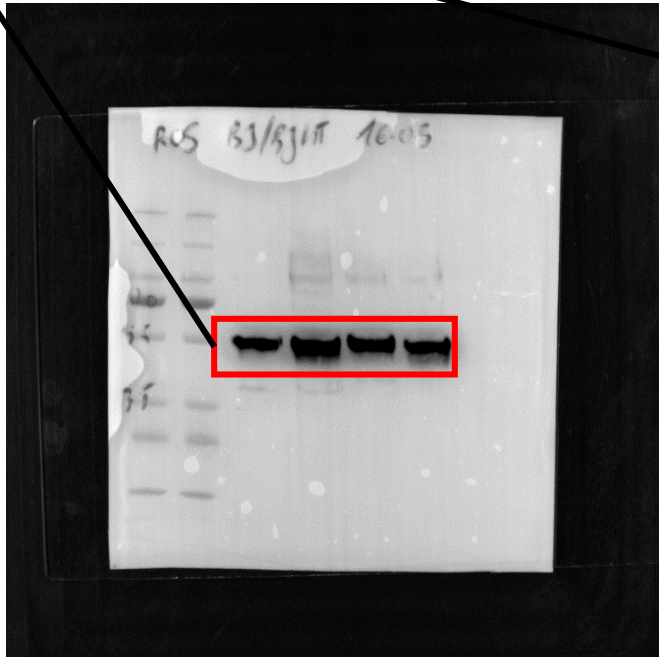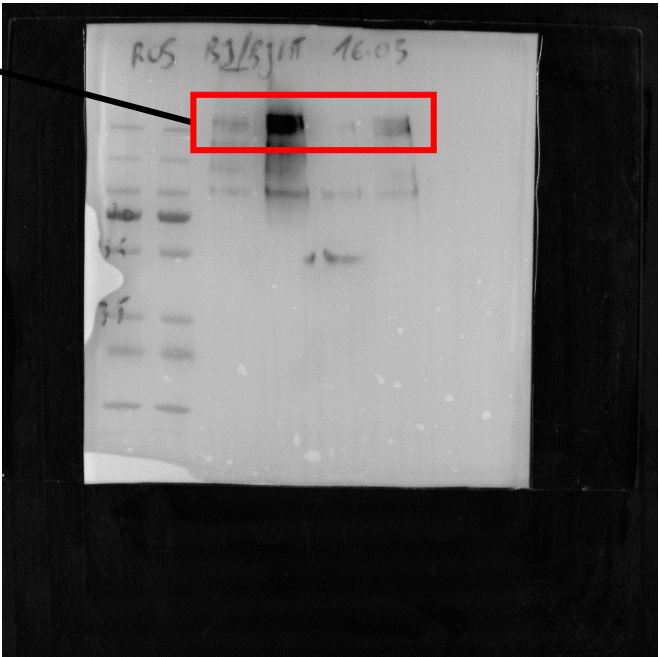

The whole Western blot figure  
(uncropped blots) of Figure 10

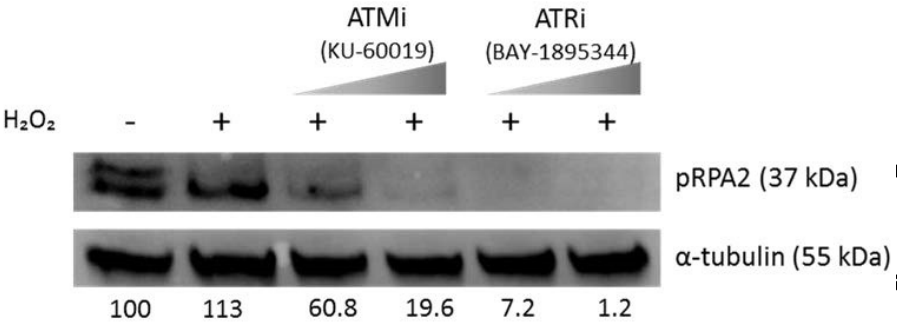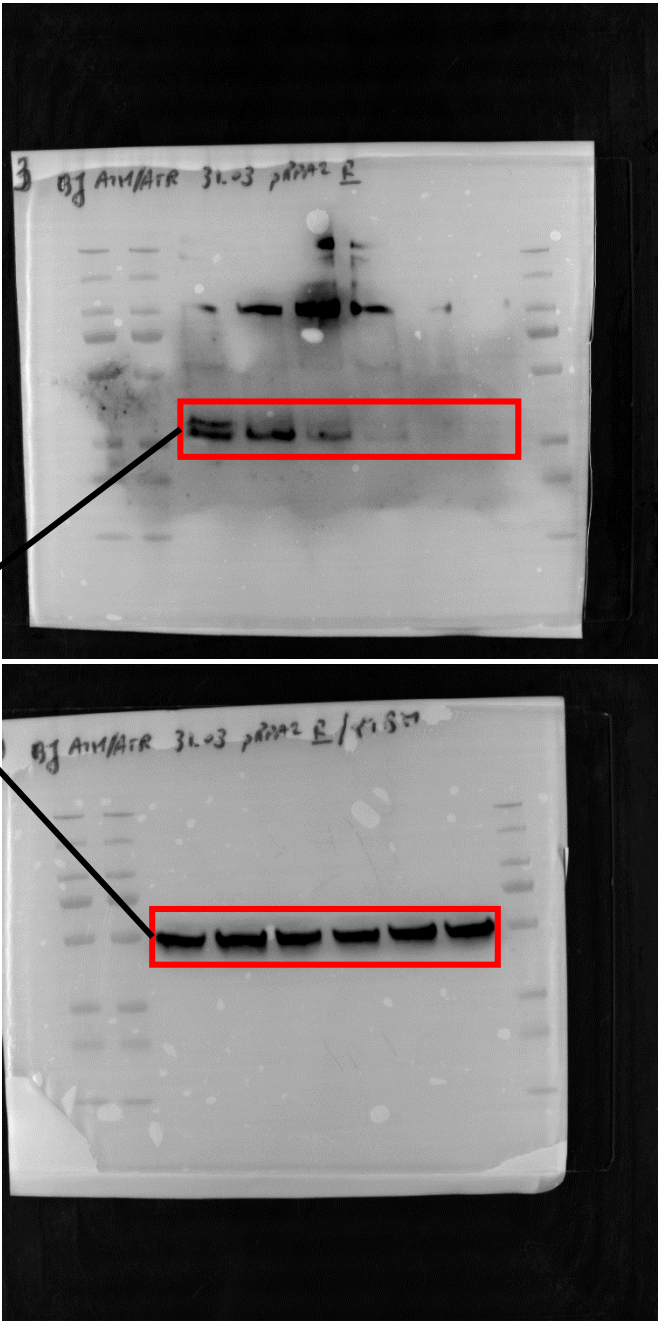

Supplement: s1 [file s1]
